# Supplementary material
Source: publisher site journal article supplement (https://www.dovepress.com/article/496512)
Supplement: Supplementary file 1 [file get_supplementary_file.php]

**Supplementary Materials**

Supplementary Table 1: Parameters estimate for different administration with one compartment kinetic with no delayed absorption for vancomycin models.

| Parameter | Bolus and linear elimination | | Bolus no delay and non-linear elimination | | Infusion no delay and linear elimination | | Infusion no delay and non-linear elimination | |
| --- | --- | --- | --- | --- | --- | --- | --- | --- |
|  | Value | RES % | Value | RES % | Value | RES % | Value | RES % |
| -2LL | 377.54 |  | 383.34 |  | 377.54 |  | 383.34 |  |
| AIC | 387.54 |  | 397.34 |  | 387.54 |  | 397.34 |  |
| BIC | 406.69 |  | 424.14 |  | 406.69 |  | 424.14 |  |
| V | 180.23 | 12.2 | 233.09 | 8.35 | 180.23 | 12.2 | 233.09 | 8.35 |
| CL | 0.94 | 32.9 | -- | -- | 0.94 | 32.9 | -- | -- |
| Vm | -- | -- | 0.041 | 376 | -- | -- | 0.041 | 376 |
| Km | -- | -- | 0.86 | 874 | -- | -- | 0.86 | 874 |
| Omega V | 0.34 | 35.8 | 0.39 | 18.3 | 0.34 | 35.8 | 0.39 | 18.3 |
| Omega CL | 0.64 | 54 | -- | -- | 0.64 | 54 | -- | -- |
| Omega, Vm | -- | -- | 2.71 | 114 | -- | -- | 2.71 | 114 |
| Omeag, Km | -- | -- | 2.94 | 153 | -- | -- | 2.94 | 153 |
| b | 0.39 | 14.6 | 0.36 | 20.8 | 0.39 | 14.6 | 0.36 | 20.8 |

Supplementary Table 2: Parameters estimate for different administration with one compartment kinetic with lag time absorption for vancomycin models.

| Parameter | Bolus and linear elimination | | Bolus and non-linear elimination | | Infusion and linear elimination | | Infusion and non-linear elimination | |
| --- | --- | --- | --- | --- | --- | --- | --- | --- |
|  | Value | RES % | Value | RES % | Value | RES % | Value | RES % |
| -2LL | 375.53 |  | 383.28 |  | 375.53 |  | 383.28 |  |
| AIC | 389.53 |  | 401.28 |  | 389.53 |  | 401.28 |  |
| BIC | 416.34 |  | 435.74 |  | 416.34 |  | 435.74 |  |
| Tlag | 0.067 | 338 | 0.2 | 161 | 0.067 | 338 | 0.2 | 161 |
| V | 158.62 | 12.5 | 229.36 | 6.79 | 158.62 | 12.5 | 229.36 | 6.79 |
| CL | 1.33 | 16.2 | -- | -- | 1.33 | 16.2 | -- | -- |
| Vm | -- | -- | 0.033 | 552 | -- | -- | 0.033 | 552 |
| Km | -- | -- | 5.79 | 310 | -- | -- | 5.79 | 310 |
| Omega Tlag | 2.22 | 39 | 1.99 | 40.4 | 2.22 | 39 | 1.99 | 40.4 |
| Omega V | 0.49 | 28.5 | 0.38 | 31 | 0.49 | 28.5 | 0.38 | 31 |
| Omega CL | 0.31 | 42.2 | -- | -- | 0.31 | 42.2 | -- | -- |
| Omega Vm | -- | -- | 2.87 | 132 | -- | -- | 2.87 | 132 |
| Omega Km | -- | -- | 1.92 | 247 | -- | -- | 1.92 | 247 |
| b | 0.37 | 14.3 | 0.37 | 13.7 | 0.37 | 14.3 | 0.37 | 13.7 |

Supplementary Table 3: Parameters estimate for different administration with two compartment kinetic with no delayed absorption for vancomycin models.

| Parameter | Bolus and linear elimination | | Bolus and non-linear elimination | | Infusion and linear elimination | | Infusion and non-linear elimination | |
| --- | --- | --- | --- | --- | --- | --- | --- | --- |
|  | Value | RES % | Value | RES % | Value | RES % | Value | RES % |
| -2LL | 375.44 |  | 378.7 |  | 375.44 |  | 378.7 |  |
| AIC | 393.44 |  | 400.7 |  | 393.44 |  | 400.7 |  |
| BIC | 427.9 |  | 442.82 |  | 427.9 |  | 442.82 |  |
| V1 | 0.000000067 | 494 | 178.12 | 31.8 | 0.000000067 | 494 | 178.12 | 31.8 |
| Q | 6.78 | 59.3 | 1.74 | 63.5 | 6.78 | 59.3 | 1.74 | 63.5 |
| V2 | 127.91 | 25.7 | 125.58 | 346 | 127.91 | 25.7 | 125.58 | 346 |
| CL | 0.97 | 55 | -- | -- | 0.97 | 55 | -- | -- |
| Vm | -- | -- | 0.27 | 107 | -- | -- | 0.27 | 107 |
| Km | -- | -- | 149.94 | 1110 | -- | -- | 149.94 | 1110 |
| Omega V1 | 4.72 | 75.3 | 0.43 | 35.2 | 4.72 | 75.3 | 0.43 | 35.2 |
| Omega Q | 0.56 | 73.5 | 0.85 | 108 | 0.56 | 73.5 | 0.85 | 108 |
| Omega V2 | 0.39 | 79.4 | 1.52 | NaN | 0.39 | 79.4 | 1.52 | NaN |
| Omega CL | 0.26 | 55.9 | -- | -- | 0.26 | 55.9 | -- | -- |
| Omega, Vm | -- | -- | 1.56 | 78 | -- | -- | 1.56 | 78 |
| Omeag, Km | -- | -- | 5.7 | 31.2 | -- | -- | 5.7 | 31.2 |
| b | 0.39 | 18.4 | 0.37 | 19.9 | 0.39 | 18.4 | 0.37 | 19.9 |

Supplementary Table 4: Parameters estimate for different administration with two compartment kinetic with lag time absorption for vancomycin models.

| Parameter | Bolus and linear elimination | | Bolus and non-linear elimination | | Infusion and linear elimination | | Infusion and non-linear elimination | |
| --- | --- | --- | --- | --- | --- | --- | --- | --- |
|  | Value | RES % | Value | RES % | Value | RES % | Value | RES % |
| -2LL | 376.31 |  | 376.4 |  | 376.31 |  | 376.4 |  |
| AIC | 398.31 |  | 402.4 |  | 398.31 |  | 402.4 |  |
| BIC | 440.43 |  | 452.19 |  | 440.43 |  | 452.19 |  |
| Tlag | 0.17 | 130 | 0.31 | 70.9 | 0.17 | 130 | 0.31 | 70.9 |
| V1 | 0.000032 | 271 | 137.81 | 19.7 | 0.000032 | 271 | 137.81 | 19.7 |
| Q | 0.48 | 15.5 | 1.91 | 28.9 | 0.48 | 15.5 | 1.91 | 28.9 |
| V2 | 41.3 | NaN | 740.13 | 99.9 | 41.3 | NaN | 740.13 | 99.9 |
| CL | 0.51 | 9.76 | -- | -- | 0.51 | 9.76 | -- | -- |
| Vm | -- | -- | 0.0017 | NaN | -- | -- | 0.0017 | NaN |
| Km | -- | -- | 784146821.5 | 1040 | -- | -- | 784146821.5 | 1040 |
| Omega Tlag | 1.85 | 41.2 | 1.14 | 53.7 | 1.85 | 41.2 | 1.14 | 53.7 |
| Omega V1 | 4.11 | 64 | 0.51 | 32.9 | 4.11 | 64 | 0.51 | 32.9 |
| Omega Q | 0.19 | 55.7 | 0.43 | 61.5 | 0.19 | 55.7 | 0.43 | 61.5 |
| Omega V2 | 0.29 | 61.2 | 1.38 | 33.7 | 0.29 | 61.2 | 1.38 | 33.7 |
| Omega CL | 0.21 | 53.2 | -- | -- | 0.21 | 53.2 | -- | -- |
| Omega, Vm | -- | -- | 1.87 | 41.5 | -- | -- | 1.87 | 41.5 |
| Omeag, Km | -- | -- | 6.89 | NaN | -- | -- | 6.89 | NaN |
| b | 0.36 | 22.3 | 0.37 | 15.2 | 0.36 | 22.3 | 0.37 | 15.2 |

Supplementary Table 5: Parameters estimate for different administration with three compartment kinetic with no delayed absorption for vancomycin models.

| Parameter | Bolus and linear elimination | | Bolus and non-linear elimination | | | | Infusion and linear elimination | | Infusion and non-linear elimination | | | |
| --- | --- | --- | --- | --- | --- | --- | --- | --- | --- | --- | --- | --- |
|  | Value | RES % | | Value | RES % | | Value | RES % | | Value | RES % | |
| -2LL | 385.42 |  | 397.09 | | |  | 385.42 |  | 397.09 | | |  |
| AIC | 401.42 |  | 409.09 | | |  | 401.42 |  | 409.09 | | |  |
| BIC | 451.2 |  | 466.52 | | |  | 451.2 |  | 466.52 | | |  |
| V1 | 0.02 | 588 | 208.36 | | | 42.3 | 0.02 | 588 | 208.36 | | | 42.3 |
| Q | 12.55 | NaN | 0.82 | | | 241 | 12.55 | NaN | 0.82 | | | 241 |
| V2 | 146.79 | 23.3 | 203.77 | | | 1370 | 146.79 | 23.3 | 203.77 | | | 1370 |
| Q2 | 0.92 | 309 | 0.0000000000000061 | | | Nan | 0.92 | 309 | 0.0000000000000061 | | | Nan |
| V3 | 5.37 | 146 | 0.0028 | | | Nan | 5.37 | 146 | 0.0028 | | | Nan |
| CL | 0.85 | 36.6 | -- | | | -- | 0.85 | 36.6 | -- | | | -- |
| Vm | -- | -- | 0.0037 | | | 975 | -- | -- | 0.0037 | | | 975 |
| Km | -- | -- | 359.09 | | | 467 | -- | -- | 359.09 | | | 467 |
| Omega V1 | 2.97 | 120 | 0.39 | | | 79.2 | 2.97 | 120 | 0.39 | | | 79.2 |
| Omega Q | 1.47 | 48.5 | 0.44 | | | 192 | 1.47 | 48.5 | 0.44 | | | 192 |
| Omega V2 | 0.35 | 83.7 | 4.92 | | | 101 | 0.35 | 83.7 | 4.92 | | | 101 |
| Omega Q2 | 3.51 | NaN | 14.49 | | | 59.8 | 3.51 | NaN | 14.49 | | | 59.8 |
| Omega V3 | 0.97 | 249 | 4.16 | | | NaN | 0.97 | 249 | 4.16 | | | NaN |
| Omega CL | 0.25 | 185 | -- | | | -- | 0.25 | 185 | -- | | | -- |
| Omega, Vm | -- | -- | 3.61 | | | 35.3 | -- | -- | 3.61 | | | 35.3 |
| Omeag, Km | -- | -- | 5.54 | | | 227 | -- | -- | 5.54 | | | 227 |
| b | 0.33 | 35.2 | 0.4 | | | 64.1 | 0.33 | 35.2 | 0.4 | | | 64.1 |

Supplementary Table 6: Parameters estimate for different administration with three compartment kinetic with lag time absorption for vancomycin models.

| Parameter | Bolus and linear elimination | | Bolus and non-linear elimination | | | | Infusion and linear elimination | | | Infusion and non-linear elimination | | |
| --- | --- | --- | --- | --- | --- | --- | --- | --- | --- | --- | --- | --- |
|  | Value | RES % | | Value | RES % | | Value | RES % | | Value | RES % | |
| -2LL | 375.44 |  | 370.89 | | |  | 375.44 | |  | 370.89 | |  |
| AIC | 405.44 |  | 404.89 | | |  | 405.44 | |  | 404.89 | |  |
| BIC | 462.87 |  | 469.98 | | |  | 462.87 | |  | 469.98 | |  |
| Tlag | 0.62 | Nan | 4.35 | | | 57.3 | 0.62 | | Nan | 4.35 | | 57.3 |
| V1 | 0.0037 | 333 | 149.65 | | | 19.6 | 0.0037 | | 333 | 149.65 | | 19.6 |
| Q | 0.067 | NaN | 2.89 | | | 59.3 | 0.067 | | NaN | 2.89 | | 59.3 |
| V2 | 4.19 | NaN | 0.32 | | | 43.6 | 4.19 | | NaN | 0.32 | | 43.6 |
| Q2 | 1.52 | 27.1 | 0.32 | | | NaN | 1.52 | | 27.1 | 0.32 | | NaN |
| V3 | 59.99 | 11.6 | 0.00035 | | | 507 | 59.99 | | 11.6 | 0.00035 | | 507 |
| CL | 0.9 | 16.8 | -- | | | -- | 0.9 | | 16.8 | -- | | -- |
| Vm | -- | -- | 0.02 | | | 422 | -- | | -- | 0.02 | | 422 |
| Km | -- | -- | 76832.93 | | | NaN | -- | | -- | 76832.93 | | NaN |
| Omega Tlag | 1.54 | 25.7 | 0.59 | | | 114 | 1.54 | | 25.7 | 0.59 | | 114 |
| Omega V1 | 2.23 | 43.9 | 0.45 | | | 43.1 | 2.23 | | 43.9 | 0.45 | | 43.1 |
| Omega Q | 0.87 | 48 | 0.59 | | | NaN | 0.87 | | 48 | 0.59 | | NaN |
| Omega V2 | 2.59 | 106 | 0.53 | | | 45.2 | 2.59 | | 106 | 0.53 | | 45.2 |
| Omega Q2 | 0.46 | 36.8 | 7.65 | | | NaN | 0.46 | | 36.8 | 7.65 | | NaN |
| Omega V3 | 0.24 | NaN | 4 | | | NaN | 0.24 | | NaN | 4 | | NaN |
| Omega CL | 0.18 | 43.9 | -- | | | -- | 0.18 | | 43.9 | -- | | -- |
| Omega, Vm | -- | -- | 2.84 | | | NaN | -- | | -- | 2.84 | | NaN |
| Omeag, Km | -- | -- | 7.17 | | | 35.6 | -- | | -- | 7.17 | | 35.6 |
| b | 0.36 | 21.8 | 0.37 | | | 16.1 | 0.36 | | 21.8 | 0.37 | | 16.1 |

Supplementary Table 7: Covariates testing on the base pharmacokinetic model.

| Parameter | OFV (-2LL) | Difference | P-value |
| --- | --- | --- | --- |
| Base model | 377.5 |  |  |
| CrCl effect on CL | 368.5 |  |  |
| CRP effect on CL | 365.3 |  |  |
| Age effect on CL | 376.2 |  |  |
| Gender effect on CL | 373.5 |  |  |
| Weight effect on CL | 376.4 |  |  |
| Albumin effect on CL | 376.3 |  |  |
| CrCl effect on V | 376.4 |  |  |
| CRP effect on V | 369.5 |  |  |
| Age effect on V | 376.6 |  |  |
| Gender effect on V | 378.9 |  |  |
| Weight effect on V | 377.3 |  |  |
| Albumin effect on V | 374.3 |  |  |

Supplementary Table 8: Backward deletion of statistically significant covariates from near final model

| Parameter | OFV (-2LL) | Difference | P-value |
| --- | --- | --- | --- |
| Covariate Base model | 348.6 |  |  |
| CRP effect on V | 349.7 |  |  |
| CrCl effect on CL | 364.3 |  |  |
| CRP effect on CL | 361.1 |  |  |
| Gender effect on CL | 355 |  |  |

Supplementary Table 9: Simulated volume of distribution and clearance for different groups based on their CRP or CrCl value.

|  | CRP | CrCl | Median V | Median Cl |
| --- | --- | --- | --- | --- |
| Group 1 | 20 | 90 | 198 | 3 |
| Group 2 | 85 | 90 | 195 | 0.2 |
| Group 3 | 180 | 90 | 196 | 0.001 |
| Group 4 | 20 | 60 | 195 | 2.2 |
| Group 5 | 70 | 60 | 195 | 0.2 |
| Group 6 | 150 | 60 | 193 | 0.0007 |
| Group 7 | 10 | 30 | 192 | 1.6 |
| Group 8 | 70 | 30 | 195 | 0.1 |
| Group 9 | 150 | 30 | 194 | 0.0005 |

| 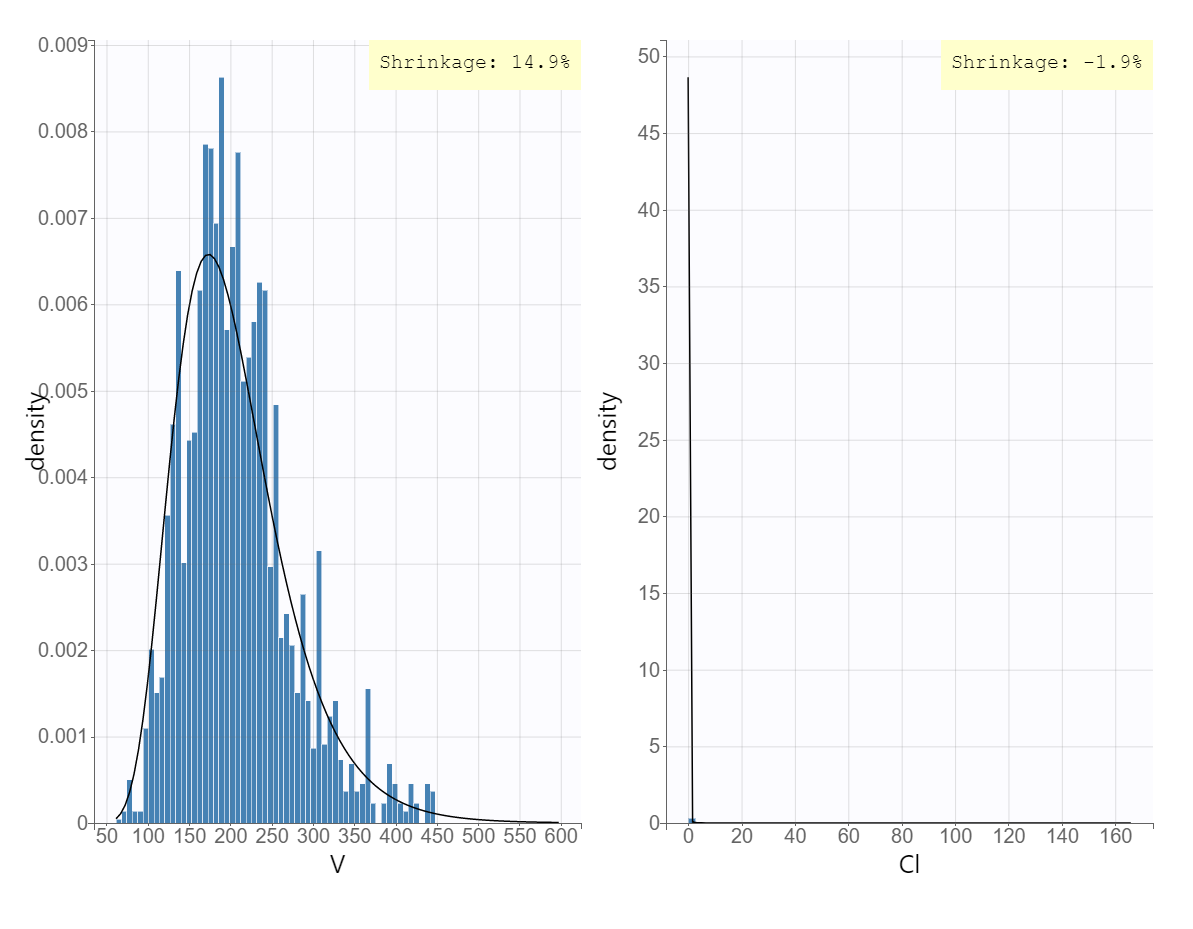 |
| --- |

Supplementary Figure 1: Shrinkage value of the final pharmacokinetic model.
